# Supplementary material
Source: PubMed Central journal article supplement (PMC3241820)
Supplement: 1108359108_pnas.201108359SI.pdf [file 1108359108_pnas.201108359SI.pdf]

# Supporting Information

Hartwig et al. 10.1073/pnas.1108359108

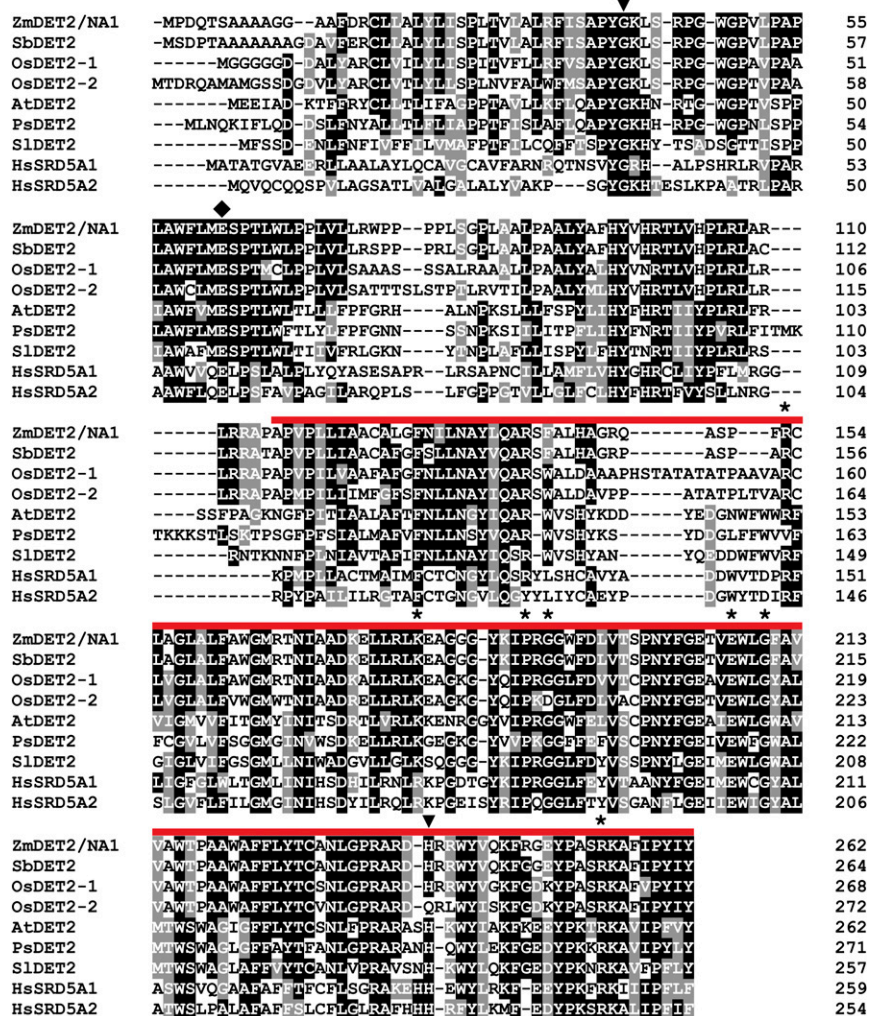

**Fig. S1.** Amino acid alignment of NA1 to selected 5 $\alpha$ -steroid reductases. Sequences were aligned with ClustalW2 (version 2.0.12; <http://www.ebi.ac.uk/Tools/clustalw2/>), and similarity shading was applied using Boxshade (version 3.21). Dashes represent gaps introduced to maximize the alignment. A red bar above the residues indicates the predicted 3-oxo-5 $\alpha$ -steroid 4-dehydrogenase domains (pfam02544). Conserved glycine and histidine residues, important for sterol binding, are indicated by inverted triangles; asterisks indicate residues important for cofactor binding originally identified in a human DET2 ortholog (1, 2); black diamond marks a glutamic acid residue shown to be important for DET2 function in Japanese morning glory (*Ipomoea nil*) (3). Zm, *Zea mays*; Sb, *Sorghum bicolor*; Os, *Oryza sativa*; At, *Arabidopsis thaliana*; Ps, *Pisum sativum*; Sl, *Solanum lycopersicum*; Hs, *Homo sapiens*.

- Russell DW, Wilson JD (1994) Steroid 5  $\alpha$ -reductase: Two genes/two enzymes. *Annu Rev Biochem* 63:25–61.
- Luo M, et al. (2007) GhDET2, a steroid 5 $\alpha$ -reductase, plays an important role in cotton fiber cell initiation and elongation. *Plant J* 51:419–430.
- Suzuki Y, et al. (2003) A dwarf mutant strain of *Pharbitis nil*, *Uzukobito (kobito)*, has defective brassinosteroid biosynthesis. *Plant J* 36:401–410.

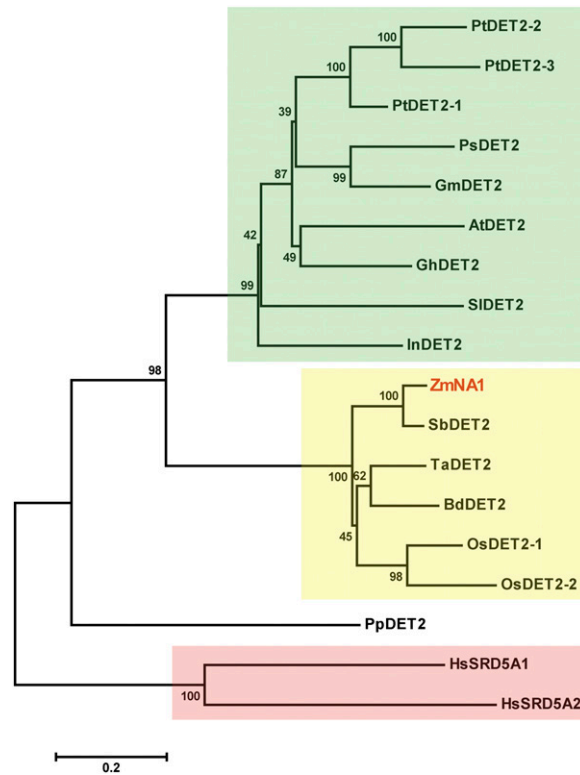

**Fig. S2.** Phylogenetic analysis of NA1 and selected  $5\alpha$ -steroid reductases. MEGA5 (1) was used to construct the phylogenetic tree based on the neighbor-joining method (2). Alignment was performed using the ClustalW function in Mega5 with default settings. The optimal tree with the sum of branch length = 5.50177703 is shown. The percentages of replicate trees in which the associated taxa clustered together in the bootstrap test (1,000 replicates) are shown next to the internal nodes (3). The evolutionary distances were computed using the JTT matrix-based method (4) and are in the units of the number of amino acid substitutions per site. All ambiguous positions were removed for each sequence pair. NA1 is highlighted in red. Monocotyledon cluster (yellow box), dicotyledon cluster (green box), and human  $5\alpha$ -steroid reductases (red box) are color-coded. Pt, *Populus tremuloides*; At, *Arabidopsis thaliana*; Gh, *Gossypium hirsutum*; Ps, *Pisum sativum*; Gm, *Glycine max*; Sl, *Solanum lycopersicon*; In, *Ipomoea nil*; Zm, *Zea mays*; Sb, *Sorghum bicolor*; Ta, *Triticum aestivum*; Bd, *Brachypodium distachyon*; Os, *Oryza sativa*; Pp, *Physcomitrella patens*; Hs, *Homo sapiens*.

1. Tamura K, et al. (2011) MEGA5: Molecular evolutionary genetics analysis using maximum likelihood, evolutionary distance, and maximum parsimony methods. *Mol Biol Evol* 28: 2731–2739.
2. Saitou N, Nei M (1987) The neighbor-joining method: A new method for reconstructing phylogenetic trees. *Mol Biol Evol* 4:406–425.
3. Felsenstein J (1985) Confidence limits on phylogenies: An approach using the bootstrap. *Evolution* 39:783–791.
4. Jones DT, Taylor WR, Thornton JM (1992) The rapid generation of mutation data matrices from protein sequences. *Comput Appl Biosci* 8:275–282.

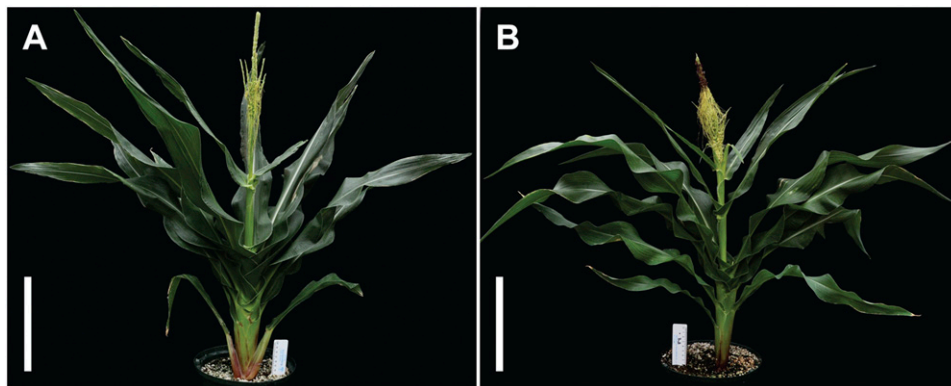

**Fig. S3.** Genetic complementation test of *na1-1* and *na1-2*. Pollen from homozygous *na1-1* plants was used to fertilize homozygous *na1-2* ears. (A) *na1-1* homozygous plant. (B) F1 plant of the cross between *na1-1* and *na1-2*. (Scale bars, 20 cm.)

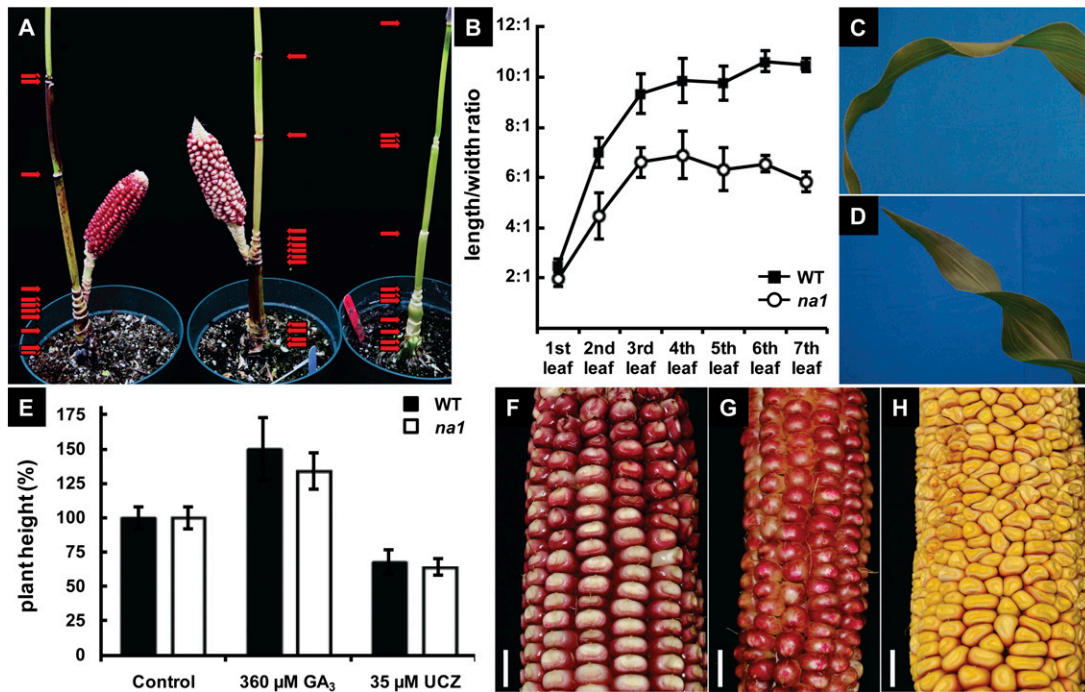

**Fig. 54.** Additional phenotypes of *na1* mutants. (A) Mature *na1-1* siblings with leaves removed for better visibility of internodes. Red arrows indicate stem nodes. Internode length varied considerably between *na1* plants. (B) Length to width ratio for the first seven fully expanded leaves of *na1-1* and WT. (C) Leaf seven of wild type (WT). (D) Twisting leaf seven of *na1-1*. (E) Light-grown WT and *na1-1* plants both treated with 360 µM GA<sub>3</sub> and 35 µM UCZ. The increase and reduction in plant height due to GA<sub>3</sub> and UCZ treatment, respectively, is similar between WT and *na1* plants. (F–H) Sex determination in ears is not altered in *na1* mutants. Ears of WT (F), *na1-1* (G), and *ts2* (H). Stamen primordia and the gynoecium of the LF did not mature in WT and *na1* mutant ear spikelets, resulting in evenly rowed kernels. In contrast, *ts2* ears display irregular kernel placement due to the development of the normally suppressed gynoecium of the LF (1). (Scale bars, 1 cm.) (B and E) Data are means ± SD; n = 10 (B) and n = 9 (E).

1. DeLong A, Calderon-Urrea A, Dellaporta SL (1993) Sex determination gene *TASSELSEED2* of maize encodes a short-chain alcohol dehydrogenase required for stage-specific floral organ abortion. *Cell* 74:757–768.

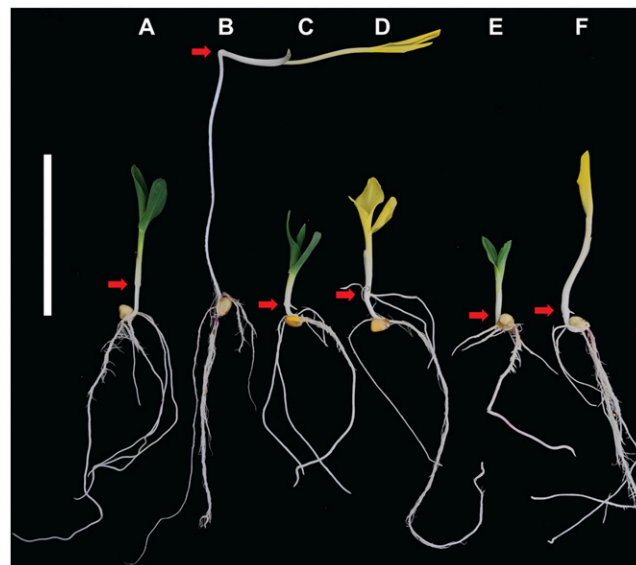

**Fig. 55.** Light and dark development of wild-type, *d5*, and *na1* seedlings. (A and B) Wild-type seedlings grown in the light (A) or dark (B). (C and D) GA deficient *d5* (1) grown in the light (C) or dark (D). (E and F) *na1-1* grown in the light (E) or dark (F). Red arrows indicate the position of first (coleoptile) node. Plants were grown as described in *Chemical Treatments*. (Scale bar, 10 cm.)

1. Fujioka S, et al. (1988) Qualitative and quantitative analyses of gibberellins in vegetative shoots of normal, *dwarf-1*, *dwarf-2*, *dwarf-3*, and *dwarf-5* seedlings of *Zea mays* L. *Plant Physiol* 88:1367–1372.

**Table S1. Characterization of *na1* alleles**

| Allele       | Mutation                                                            | Position | Orig. genetic background | Seed source           |
|--------------|---------------------------------------------------------------------|----------|--------------------------|-----------------------|
| <i>na1-1</i> | <i>Mu</i> insertion; 9 bp target site duplication (5'-CCGCACGCT-3') | 298–306  | Mixed <i>Mu</i> -active  | This work             |
| <i>na1-2</i> | G to C transversion; results in nonsense substitution W163 > STOP   | 489      | Unknown                  | G. Neuffer/Maize COOP |
| <i>na1-3</i> | <i>Mu</i> insertion; 9 bp target site duplication (5'-CGCGCAAGG-3') | 758–766  | Mixed <i>Mu</i> -active  | This work             |
| <i>na1-4</i> | <i>Mu</i> insertion; 9 bp target site duplication (5'-AGATCCCGA-3') | 557–565  | Mixed <i>Mu</i> -active  | This work             |

To determine the position of a mutation in the *na1* gene, the A of the *na1* translational start (ATG) was counted as +1. Sequences of *na1* mutant alleles were deposited in GenBank (*na1-1*, JN020029; *na1-2*, JN020030; *na1-3*, JN020031; *na1-4*, JN020032).

**Table S2. Induction of tassel floret feminization after exogenous application of PCZ**

| Line         | PCZ, $\mu$ M | No. of plants | Dwarf phenotype | Staminate tassel florets | Up to 50% of tassel florets feminized | >50% of tassel florets feminized |
|--------------|--------------|---------------|-----------------|--------------------------|---------------------------------------|----------------------------------|
| Wild type    | 0            | 13            | 0               | 13                       | 0                                     | 0                                |
| <i>na1-1</i> | 0            | 13            | 13              | 7                        | 5                                     | 1                                |
| Wild type    | 500          | 13            | 13              | 0                        | 11                                    | 2                                |
| <i>na1-1</i> | 500          | 13            | 13              | 0                        | 4                                     | 9                                |

Plants were grown as described in *Chemical Treatments* in Turface and watered with fertilizer solution supplemented with 500  $\mu$ M PCZ. A dwarf phenotype was scored if the total height did not exceed one-third of wild-type height and the secondary *na1* mutant phenotypic features (dark-green, short, twisting leaves) were present.

**Table S3. Endogenous BR profiles of wild-type and *na1-1* plants for each independently grown biological replicate**

| BR intermediates            | WT replica1,<br>ng per g of fw | WT replica2,<br>ng per g of fw | <i>na1</i> replica1,<br>ng per g of fw | <i>na1</i> replica2,<br>ng per g of fw |
|-----------------------------|--------------------------------|--------------------------------|----------------------------------------|----------------------------------------|
| 24-Methylenecholesterol     | 981                            | 737                            | 1,040                                  | 864                                    |
| Campesterol                 | 52,400                         | 28,300                         | 40,400                                 | 29,500                                 |
| 4-en-3-one                  | 152                            | 126                            | 693                                    | 623                                    |
| 3-one                       | 6.8                            | 8.8                            | 1.1                                    | 0.8                                    |
| Campestanol                 | 944                            | 709                            | 2.9                                    | 64.9                                   |
| 6-Deoxocathasterone         | 0.2                            | 0.34                           | n.d.                                   | 0.05                                   |
| 6-Deoxoteasterone           | 0.01                           | 0.05                           | n.d.                                   | 0.02                                   |
| 3-Dehydro-6-deoxoteasterone | 0.35                           | 0.21                           | n.d.                                   | n.d.                                   |
| 6-Deoxytyphasterol          | 1.8                            | 1.98                           | n.d.                                   | 0.23                                   |
| 6-Deoxocastasterone         | 5.18                           | 6.26                           | n.d.                                   | 0.47                                   |
| 6-Oxocampestanol            | 8.1                            | 19.9                           | 4.9                                    | 14.4                                   |
| Cathasterone                | n.d.                           | n.d.                           | n.d.                                   | n.d.                                   |
| Teasterone                  | n.d.                           | n.d.                           | n.d.                                   | 0.09                                   |
| Typhasterol                 | 0.04                           | 0.05                           | 0.15                                   | 0.13                                   |
| Castasterone                | 1.03                           | 1.25                           | n.d.                                   | 0.13                                   |
| Brassinolide                | n.d.                           | n.d.                           | n.d.                                   | n.d.                                   |

A pool of 20 g of fresh weight (WT replicate1, 20.71 g fw; WT replicate2, 20.05 g fw; *na1-1* replicate1, 20.57 g fw; and *na1-1* replicate2, 20.88 g fw) from 10 individuals was analyzed for each replicate. n.d., not detected.

**Table S4. 5 $\alpha$ -steroid reductases used in the phylogenetic analysis of ZmDET2/NA1**

| Sequence ID | Organism                       | GenBank accession (Gene ID) |
|-------------|--------------------------------|-----------------------------|
| AtDET2      | <i>Arabidopsis thaliana</i>    | NP_181340 (At2g38050)       |
| BdDET2      | <i>Brachypodium distachyon</i> | (Bradi2G55110)              |
| GhDET2      | <i>Gossypium hirsutum</i>      | AAZ83346                    |
| GmDET2      | <i>Glycine max</i>             | AAG35638                    |
| HmSRD5A1    | <i>Homo sapiens</i>            | NP_001038                   |
| HmSRD5A2    | <i>Homo sapiens</i>            | NP_000339                   |
| InDET2      | <i>Ipomoea nil</i>             | BAC87862                    |
| OsDET2-1    | <i>Oryza sativa</i>            | NP_001044822 (Os01g0851600) |
| OsDET2-1    | <i>Oryza sativa</i>            | NP_001176391 (Os11g0184100) |
| PpDET2      | <i>Physcomitrella patens</i>   | XP_001769717                |
| PsDET2      | <i>Pisum sativum</i>           | AAT76665                    |
| PtDET2-1    | <i>Populus temuloides</i>      | XP_002323554                |
| PtDET2-2    | <i>Populus temuloides</i>      | XP_002319902                |
| PtDET2-3    | <i>Populus temuloides</i>      | XP_002328371                |
| SbDET2      | <i>Sorghum bicolor</i>         | JN020028 (Sb03g040050)      |
| SIDET2      | <i>Solanum lycopersicon</i>    | CAH05260                    |
| TaDET2      | <i>Triticum aestivum</i>       | CBH32517                    |
| ZmDET2/NA1  | <i>Zea mays</i>                | NP_001149816                |
